# Supplementary material for: Assessment of Enzyme-Mediated Modulation of rAAV Vectors: Effects on Cellular Transduction and Capsid Stability
Source: Research Square preprint supplement (doi:10.21203/rs.3.rs-8426890/v1), 2026-02-03
Supplement: Supplementary file 1 [file 1219216e07cbaf0dd92c461f.xlsx]

## Sheet: Sheet1
Table S3. DLS Volume-Weighted Assessment on rAAV2 a,b,c
Condition	PDI%	Diameter Peak 1 (nm)	Diameter Peak 2 (nm)	Diameter Peak 3 (nm)
Post Filter	28.96	22.74 (86.95%)	527.46 (10.64%)	2895.21 (2.40%)
(Endo Ctrl)	37.29	18.92 (85.78%)	129.85 (4.72%)	602.45 (9.51%)
Post Filter	42.79	24.36 (100%)	-	-
(Endo)	43.12	24.95 (100%)	-	-
Post Filter	45.79	22.15 (97.65%)	143.30 (1.60%)	318.25 (0.75%)
(Exo Ctrl)	-	-	-	-
Post Filter	46.24	23.06 (93.92%)	146.71 (3.77%)	307.10 (2.31%)
(Exo)	39.58	18.87 (91.25%)	102.32 (8.75%)	-
37°C Day 5	49.26	35.86 (91.54%)	450.01 (8.46%)	-
(Endo Ctrl)	45.41	27.66 (98.01%)	405.93 (1.99%)	-
37°C Day 5	45.15	25.23 (100%)	-	-
(Endo)	44.72	25.89 (100%)	-	-
37°C Day 5	46.42	23.62 (94.93%)	113.59 (2.53%)	447.5 (2.54%)
(Exo Ctrl)	49.51	25.95 (97.25%)	336.35 (2.75%)	-
37°C Day 5	45.25	22.58 (95.95%)	126.59 (4.05%)	-
(Exo)	46.27	26.25 (96.99%)	127.27 (2.11%)	347.99 (0.90%)
37°C Day 21	40.01	30.86 (95.14)	568.12 (3.11%)	7859.86 (1.75%)
(Endo Ctrl)	40.17	29.47 (97.65%)	1576.78 (2.35%)	-
37°C Day 21	44.77	24.37 (100%)	-	-
(Endo)	45.86	19.71 (96.83%)	112.68 (3.17%)	-
37°C Day 21	43.96	24.66 (100%)	-	-
(Exo Ctrl)	45.62	25.46 (100%)	-	-
37°C Day 21	45.66	22.71 (94.96%)	106.45 (5.04%)	-
(Exo)	45.14	27.34 (98.42%)	379.38 (1.58%)	-
