# Supplementary material for: Assessment of Enzyme-Mediated Modulation of rAAV Vectors: Effects on Cellular Transduction and Capsid Stability
Source: Research Square preprint supplement (doi:10.21203/rs.3.rs-8426890/v1), 2026-02-03
Supplement: Supplementary file 2 [file 6ae9e6cfccbb81fdd386ee3e.xlsx]

## Sheet: Table 5
Table 5. Impact of differences that may result in stability
Parameters	Rodriquez et al. [42]	Current Study
Serotype	rAAV9	rAAV2
Buffer Composition	1x PBS pH 7.5 + 5% v/v Glycerol	10 mM Tris pH 8.0 + 100 mM sodium citrate
Concentration (cp/mL)	2.65E13	3.0E12
Full/Empty Ratio (%)	50	65
