# Supplementary material for: Assessment of Enzyme-Mediated Modulation of rAAV Vectors: Effects on Cellular Transduction and Capsid Stability
Source: Research Square preprint supplement (doi:10.21203/rs.3.rs-8426890/v1), 2026-02-03
Supplement: Supplementary file 3 [file 769855c03d943235d852360a.xlsx]

## Sheet: Table 3
Table 3. Melting temperature analysis of treated/non-treated rAAV a,b
rAAV Serotype	Sample Name	Tm1 (oC)	Tm2 (oC)
NA	DPBS (Negative Control)	NM	NM
NA	mAb (Positive Control)	62.04 ± 0.94	84.73 ± 1.13
2	Not Treated	67.22 ± 0.75	NM
	Endoglycosidase Treated c	47.22 ± 0.10	67.33 ± 0.48
	Exoglycosidase Treated d,e	45.78 ± 0.07	67.22 ± 1.09
8	Not Treated	70.01 ± 1.28	NM
	Endoglycosidase Treated c	48.13 ± 0.39	70.09 ± 0.51
	Exoglycosidase Treated d,e	56.35 ± 0.77	70.09 ± 1.03
9	Not Treated	72.13 ± 2.99	NM
	Endoglycosidase Treated c	52.45 ± 0.22	72.13 ± 0.42
