# Supplementary material for: Assessment of Enzyme-Mediated Modulation of rAAV Vectors: Effects on Cellular Transduction and Capsid Stability
Source: Research Square preprint supplement (doi:10.21203/rs.3.rs-8426890/v1), 2026-02-03
Supplement: Supplementary file 4 [file 9e1aa335dd3968982a5e0900.xlsx]

## Sheet: Table 2
Table 2. rAAV retention time based on strong AEX separation a
Treatment	Sample	Retention Time	p-value d
Endoglycosidase b	Not Treated	15.62 ± 0.16	0.0036
	Treated	15.95 ± 0.06
Exoglycosidase c	Not Treated	16.09 ± 0.03	0.1445
	Treated	16.15 ± 0.05
