# Supplementary material for: Assessment of Enzyme-Mediated Modulation of rAAV Vectors: Effects on Cellular Transduction and Capsid Stability
Source: Research Square preprint supplement (doi:10.21203/rs.3.rs-8426890/v1), 2026-02-03
Supplement: Supplementary file 5 [file a229369bc8e9752244730b77.xlsx]

## Sheet: Table 4
Table 4. Identified N-linked Glycan Profiles on rAAV2 samples with Mass Spec
Identified Glycan Species	Theoretical mass a	Measured m/z	Ion	Error (ppm) b	Retention Time (min.)	Glucose Unit (GU)	Literature GU c	% CV Error (GU)
HM5	1496.58	1496.4	[M+H]¹+	-122.145	9.551	6.15	6.23	0.91387
	748.791	748.704	[M+2H]2+	-115.253
HM6	1658.63	1658.43	[M+H]¹+	-121.365	12.696	7.35	7.29	0.579596
	829.817	829.721	[M+2H]2+	-115.206
HM7	1820.69	1820.47	[M+H]¹+	-117.099	15.243	8.34	8.34	0
	910.843	911.005	[M+2H]2+	176.869
HM9	1072.9	1073.28	[M+2H]2+	358.283	21.278	10.71	10.82	0.722543
Note:
