# Supplementary material for: Assessment of Enzyme-Mediated Modulation of rAAV Vectors: Effects on Cellular Transduction and Capsid Stability
Source: Research Square preprint supplement (doi:10.21203/rs.3.rs-8426890/v1), 2026-02-03
Supplement: Supplementary file 6 [file b9dcd056ae12f6ce4f87c332.xlsx]

## Sheet: Sheet1
Table S4. DLS Intensity-Weighted Assessment of rAAV2 a,b,c
Condition	PDI%	Diameter Peak 1 (nm)	Diameter Peak 2 (nm)	Diameter Peak 3 (nm)
Post Filter	28.96	25.05 (3.82%)	353.66 (89.27%)	2901 (6.91%)
(Endo Ctrl)	37.29	19.60 (2.33%)	354.02 (97.67%)	-
Post Filter	42.79	23.17 (9.46%)	159.82 (90.54%)	-
(Endo)	43.12	25.61 (11.97%)	177.87 (88.03%)	-
Post Filter	45.79	26.69 (14.17%)	226.06 (85.83%)	-
(Exo Ctrl)	-	-	-	-
Post Filter	46.24	24.28 (4.69%)	228.37 (95.31%)	-
(Exo)	39.58	21.61 (7.10%)	145.4 (92.90%)	-
37°C Day 5	49.26	44.27 (21.66%)	386.76 (78.34%)	-
(Endo Ctrl)	45.41	39.22 (24.32%)	279.09 (75.68%)	-
37°C Day 5	45.15	156.67 (98.74%)	5031.17 (1.26%)	-
(Endo)	44.72	180.38 (100%)	-	-
37°C Day 5	46.42	29.13 (14.03%)	287.42 (85.97%)	-
(Exo Ctrl)	49.51	29.21 (15.40%)	283.76 (84.60%)	-
37°C Day 5	45.25	26.78 (16.18%)	177.51 (83.82%)	-
(Exo)	46.27	0.30 (2.03%)	33.46 (20.67%)	225.03 (77.30%)
37°C Day 21	40.01	40.55 (27.65%)	384.68 (59.77%)	7734.44 (12.59%)
(Endo Ctrl)	40.17	36.12 (31.02%)	328.77 (48.59%)	1583.51 (20.39%)
37°C Day 21	44.77	26.49 (18.22%)	156.31 (81.78%)	-
(Endo)	45.86	25.67 (18.14%)	164.45 (81.86%)	-
37°C Day 21	43.96	33.36 (39.01%)	212.22 (60.99%)	-
(Exo Ctrl)	45.62	34.42 (30.72%)	229.76 (69.28%)	-
37°C Day 21	45.66	26.91 (14.20%)	195.31 (85.12%)	866.93 (0.68%)
(Exo)	45.14	0.33 (2.20%)	40.58 (27.82%)	274.83 (69.98%)
