# Supplementary material for: Assessment of Enzyme-Mediated Modulation of rAAV Vectors: Effects on Cellular Transduction and Capsid Stability
Source: Research Square preprint supplement (doi:10.21203/rs.3.rs-8426890/v1), 2026-02-03
Supplement: Supplementary file 7 [file e310ac4654f0b2588b7526d9.xlsx]

## Sheet: Table 1
Table 1. Glycan Mass Spec Tune Setting for ESI +
Capillary Source (kV)	3
Sampling Cone (V)	30
Source Offset	80
Temperature Source (oC)	120
Temperature Desolvation (oC)	300
Cone Gas Flow (L/h)	50
Desolvation Gas (L/h)	800
LockSpray Capillary (kV)	3
